# Supplementary material for: Development of a Reinforcement Learning Algorithm to Optimize Corticosteroid Therapy in Critically Ill Patients with Sepsis
Source: MDPI journal article supplement (doi:10.3390/jcm12041513), 2023-02-14
Supplement: s1 [file s1]

# **Development of a Reinforcement Learning Algorithm to Optimize Corticosteroid Therapy in Critically Ill Patients with Sepsis**

## **Supplemental Material. Table of Contents**

|                                                                                                                                                                    |   |
|--------------------------------------------------------------------------------------------------------------------------------------------------------------------|---|
| Supplemental Material. Table of Contents .....                                                                                                                     | 1 |
| Supplemental Table S1. Diagnosis of sepsis .....                                                                                                                   | 2 |
| Supplemental Table S2. Input features included in development of the algorithm .....                                                                               | 3 |
| Supplemental Figure S1. Development of the RL Algorithm.....                                                                                                       | 5 |
| Supplemental Figure S2. Micro-average ROC curve of the random forest model.....                                                                                    | 6 |
| Supplemental Table S3. The most relevant predictors of the clinicians' policy according to the<br>random forest model ordered from the lowest to highest rank..... | 7 |
| Supplemental Table S4. The most relevant feature for the RL policy listed from the lowest to highest<br>rank.....                                                  | 8 |
| Supplemental Figure S3. The 20 most relevant input features for the RL and random forest models                                                                    | 9 |

Supplemental Table S1. Diagnosis of sepsis

| <b>Non-prophylactic anti-infective drugs used</b> | <b>Cultures drawn suggestive of sepsis</b> | <b>Admission diagnosis suggestive of infection</b> |
|---------------------------------------------------|--------------------------------------------|----------------------------------------------------|
| Amikacin                                          | Urine culture                              | Pneumonia                                          |
| Amoxicillin                                       | MRSA swab                                  | Meningitis                                         |
| Benzylpenicillin                                  | Blood culture                              | Endocarditis                                       |
| Ceftazidime                                       | Catheter tip culture                       | Cholangitis                                        |
| Cefotaxime                                        | Drain fluid culture                        | Pancreatitis                                       |
| Ciprofloxacin                                     | Stool culture                              | Abscess                                            |
| Rifampicin                                        | CSF culture                                | Fasciitis                                          |
| Clindamycin                                       | Nasal swab                                 | Peritonitis                                        |
| Tobramycin                                        | Perineal swab                              | GI perforation/rupture                             |
| Vancomycin                                        | Rectal swab                                | GI ischemia                                        |
| Imipenem                                          | Wound swab                                 | Diverticulitis                                     |
| Doxycycline                                       | Ascites culture                            | Sepsis                                             |
| Metronidazole                                     | Legionella urinary antigen                 | Infection                                          |
| Erythromycin                                      |                                            | Inflammatory                                       |
| Flucloxacillin                                    |                                            |                                                    |
| Fluconazole                                       |                                            |                                                    |
| Ganciclovir                                       |                                            |                                                    |
| Flucytosine                                       |                                            |                                                    |
| Gentamicin                                        |                                            |                                                    |
| Foscarnet                                         |                                            |                                                    |
| Amphotericin B                                    |                                            |                                                    |
| Meropenem                                         |                                            |                                                    |
| Myambutol                                         |                                            |                                                    |
| Co-Trimoxazole                                    |                                            |                                                    |
| Voriconazole                                      |                                            |                                                    |
| Amoxicillin/Clavulanic acid                       |                                            |                                                    |
| Aztreonam                                         |                                            |                                                    |
| Chloramphenicol                                   |                                            |                                                    |
| Fusidic acid                                      |                                            |                                                    |
| Piperacillin                                      |                                            |                                                    |
| Ceftriaxone                                       |                                            |                                                    |
| Cefuroxime                                        |                                            |                                                    |
| Cefazoline                                        |                                            |                                                    |
| Caspofungin                                       |                                            |                                                    |
| Itraconazole                                      |                                            |                                                    |
| Levofloxacin                                      |                                            |                                                    |
| Anidulafungin                                     |                                            |                                                    |
| Linezolid                                         |                                            |                                                    |
| Tigecycline                                       |                                            |                                                    |
| Daptomycin                                        |                                            |                                                    |
| Colistin                                          |                                            |                                                    |

MRSA: Methicillin-resistant *Staphylococcus aureus*; CSF: cerebrospinal fluid; GI: gastro-intestinal.

Patients with sepsis were identified based on the Sepsis-3 criteria. Accordingly, patients with new organ dysfunction as indicated by either a SOFA score  $\geq 2$  at admission or an increase of 2 points or more in the SOFA score during the ICU stay in the context of suspected infection were included in the sepsis cohort used to develop the RL algorithm. The definition of suspected infection, which has been previously described (Thoral et al., AmsterdamUMCdb GitHub repository), was operationalized by identifying antibiotic therapy (other than prophylactic use), cultures drawn, sepsis flagged by admitting physicians or admission diagnosis suggestive for severe infection. The onset of the septic episode was considered the day the change in the SOFA score occurred and patients remained in the sepsis cohort until discharge or death.

Supplemental Table S2. Input features included in development of the algorithm

| Category                | Variable                                                                                                                               | Type       | Preprocessing and derived features         |
|-------------------------|----------------------------------------------------------------------------------------------------------------------------------------|------------|--------------------------------------------|
| Patient characteristics | Age (years)                                                                                                                            | Discrete   | Bins*                                      |
|                         | Male gender                                                                                                                            | Boolean    | -                                          |
|                         | Weight (kg)                                                                                                                            | Continuous | -                                          |
|                         | Admission count                                                                                                                        | Discrete   | -                                          |
| Vital parameters        | Respiratory rate ( $\text{min}^{-1}$ )                                                                                                 | Continuous | Mean, minimum, maximum, standard deviation |
|                         | Heart rate ( $\text{min}^{-1}$ )                                                                                                       | Continuous |                                            |
|                         | Invasive systolic, diastolic, and mean blood pressure (mmHg)                                                                           | Continuous |                                            |
|                         | Non-invasive systolic, diastolic, and mean blood pressure (mmHg)                                                                       | Continuous |                                            |
|                         | SpO <sub>2</sub>                                                                                                                       | Continuous |                                            |
|                         | Temperature ( $^{\circ}\text{C}$ )                                                                                                     | Continuous |                                            |
| Laboratory values       | AG (mEq/l), BE (mEq/l), Bicarbonate (mEq/l), pH, Lactate (mmol/l), PaCO <sub>2</sub> (mmHg), PaO <sub>2</sub> (mmHg), SaO <sub>2</sub> | Continuous | Mean, minimum, maximum, standard deviation |
|                         | ACTH (pmol/l), Cortisol (nmol/l), TSH (mIU/l), fT <sub>3</sub> (pmol/l)                                                                | Continuous |                                            |
|                         | Albumin (g/l), Ammonia ( $\mu\text{mol/l}$ ), Bilirubin ( $\mu\text{mol}$ ), GOT (U/l), GPT (U/l)                                      | Continuous |                                            |
|                         | Blood glucose (mmol/l)                                                                                                                 | Continuous |                                            |
|                         | CRP (mg/l), PCT ( $\mu\text{g/l}$ )                                                                                                    | Continuous |                                            |
|                         | Ca (mg/dl), Cl (mmol/l), Fe ( $\mu\text{mol/l}$ ), K (mmol/l), Mg (mg/dl), Na (mmol/l), Phosphate (mg/dl), iCa                         | Continuous |                                            |
|                         | Total cholesterol, HDL-cholesterol, LDL-cholesterol (mmol/l) Triglycerides (mg/dl)                                                     | Continuous |                                            |
|                         | Serum creatinine ( $\mu\text{mol/l}$ ), Serum urea (mmol/l), eGFR (ml/min)                                                             | Continuous |                                            |
|                         | Fibrinogen (mg/dl), PTT (s), PT (s)                                                                                                    | Continuous |                                            |
|                         | GSF Glucose (mmol/l), CSF Leucocytes ( $\text{ml}^{-1}$ ), CSF Protein (mg/dl)                                                         | Continuous |                                            |

|                                 |                                                                                                                                       |            |                                                                                         |
|---------------------------------|---------------------------------------------------------------------------------------------------------------------------------------|------------|-----------------------------------------------------------------------------------------|
|                                 | Hematocrit, Hemoglobin (g/l), RBC count, Leucocyte count, Lymphocytes count, Neutrophils count, MCH (pg), MCV (fl), Thrombocyte count | Continuous |                                                                                         |
|                                 | Urinary Na (mEq/l), Urinary K (mEq/l), Urinary Creatinine (mmol/day), Urinary Urea (mmol/day)                                         | Continuous |                                                                                         |
| <b>Ventilation parameters</b>   | FiO <sub>2</sub>                                                                                                                      | Continuous | Mean, minimum, maximum, standard deviation                                              |
|                                 | PEEP (cmH <sub>2</sub> O)                                                                                                             | Continuous |                                                                                         |
|                                 | Set respiratory rate (min <sup>-1</sup> )                                                                                             | Continuous |                                                                                         |
| <b>Fluid balance</b>            | Urine output (ml)                                                                                                                     | Continuous | -                                                                                       |
|                                 | Net fluid balance (ml)                                                                                                                | Continuous | -                                                                                       |
|                                 | Ultrafiltration rate (ml/h)                                                                                                           | Continuous | -                                                                                       |
| <b>Commonly used medication</b> | Dose of fast-acting insulins: Actrapid, Novorapid, Velosulin (IU)                                                                     | Continuous | Mean, minimum, maximum, standard deviation, and sum for continuously administered drugs |
|                                 | Dose of benzodiazepines: Alprazolam, Lorazepam, Midazolam, Oxazepam, Temazepam                                                        | Continuous |                                                                                         |
|                                 | Dose of other sedatives and analgesics: Clonidine, Fentanyl, Haloperidol, Morphine, Propofol                                          | Continuous |                                                                                         |
|                                 | Dose of antiplatelet and anticoagulant drugs: Clopidogrel, Heparin                                                                    | Continuous |                                                                                         |
|                                 | Dose of antiarrhythmic drugs: Metoprolol, Amiodarone                                                                                  | Continuous |                                                                                         |
|                                 | Dose of vasopressors and inotropic agents: Digoxin, Dopamine, Noradrenaline                                                           | Continuous |                                                                                         |
|                                 | Diuretics: Furosemide, Spironolactone                                                                                                 | Continuous |                                                                                         |
|                                 | Highest antibiotic rank**                                                                                                             | Discrete   |                                                                                         |
|                                 | Antiviral drugs                                                                                                                       | Boolean    |                                                                                         |
|                                 | Antifungal drugs                                                                                                                      | Boolean    |                                                                                         |

Supplemental Table S2 presents all the input variables collected and the derived features used for developing the reinforcement learning algorithm, after excluding the variables not represented < 2% of the datapoints. SpO<sub>2</sub>: peripheral oxygen saturation; SOFA: sequential organ failure assessment; AG: anion gap; BE: base excess; pH: potential of hydrogen; PaCO<sub>2</sub>, PaO<sub>2</sub>: partial pressure of carbon dioxide and oxygen, respectively, in arterial blood; SaO<sub>2</sub>: arterial oxygen saturation; ACTH: adrenocorticotrophic hormone; TSH: thyroid-stimulating hormone; fT<sub>3</sub>: free triiodothyronine; GOT: serum glutamic-oxaloacetic transaminase; GPT: serum glutamic-pyruvic transaminase; CRP: C reactive protein; PCT: procalcitonin; Ca: total calcium; Cl: chloride; Fe: serum iron; K: serum potassium; Mg: serum magnesium; Na: serum sodium; iCa: ionized Calcium; HDL: high-density lipoprotein; LDL: low-density lipoprotein; eGFR: estimated glomerular filtration rate; PTT: partial thromboplastin time; PT: prothrombin time; CSF:

cerebrospinal fluid; RBC: red blood cell; MCH: mean corpuscular hemoglobin; MCV: mean corpuscular volume; FiO<sub>2</sub>: fraction of inspired oxygen.

\*Age was sorted into bins: 18-39 years, 40-49 years, 50-59 years, 60-69 years, 70-79 years, 80+ years

\*\*Antibiotics were classified by rank after Braykov et al. and the highest rank of antibiotics administered was used as input feature.

Supplemental Figure S1. Development of the RL Algorithm

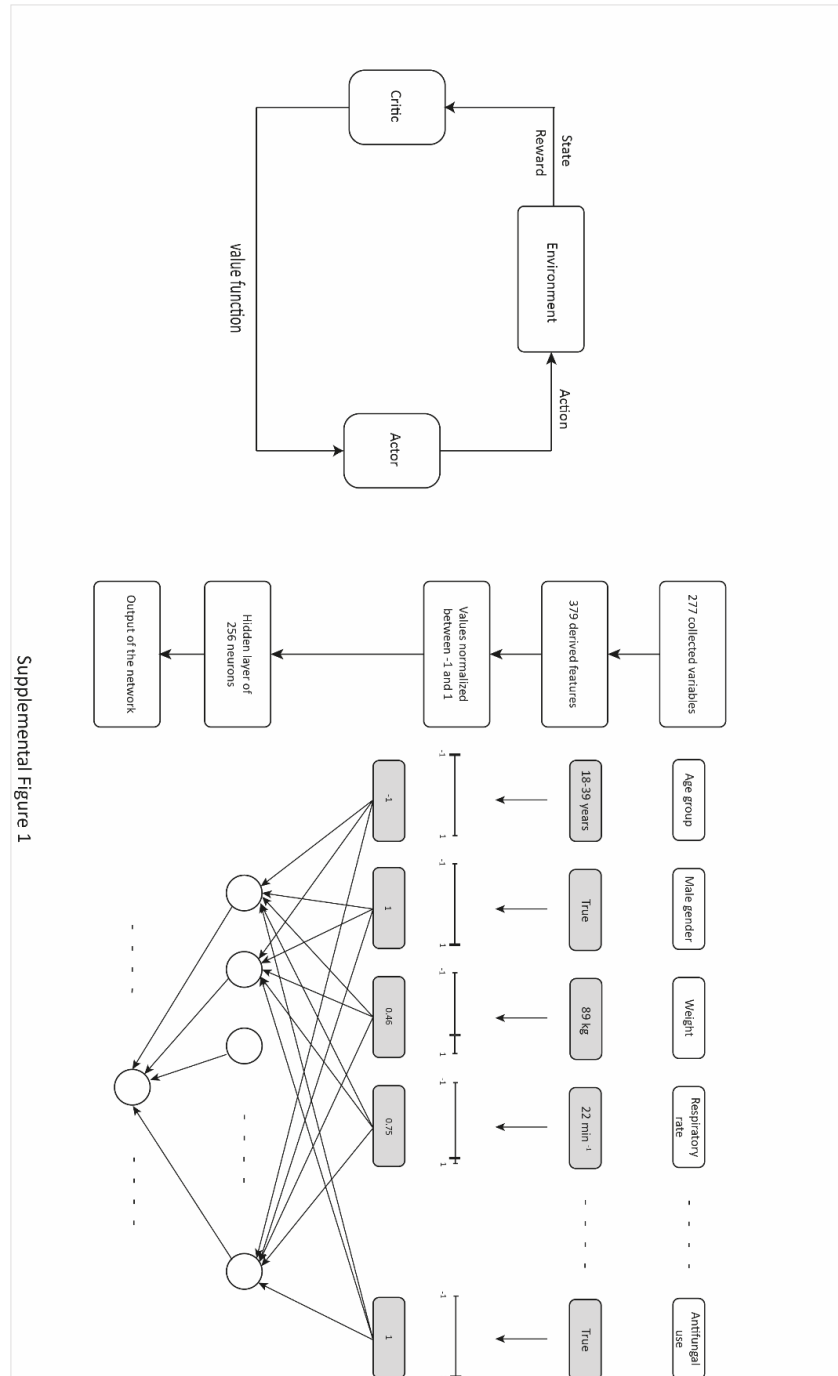

For each day of the ICU stays included in the sepsis cohort, a set of 281 variables were collected, of which 277 were used as inputs. Using imputation and normalization, we derived a balanced dataset of

379 input variables. The RL algorithm consisted of 2 neural networks, with a similar structure that includes a hidden layer of 256 hidden neurons, but different outputs. The actor network has 5 potential outputs, corresponding to the 5 possible actions. The critic network ends in one node terminates with a single node. The 2 networks interact to determine the optimal policy. the actor network proposes an action based on the current state of the environment and the environment changes its state. The critic network evaluates the actor network based on the reward that the chosen action returns.

Supplemental Figure S2. Micro-average ROC curve of the random forest model

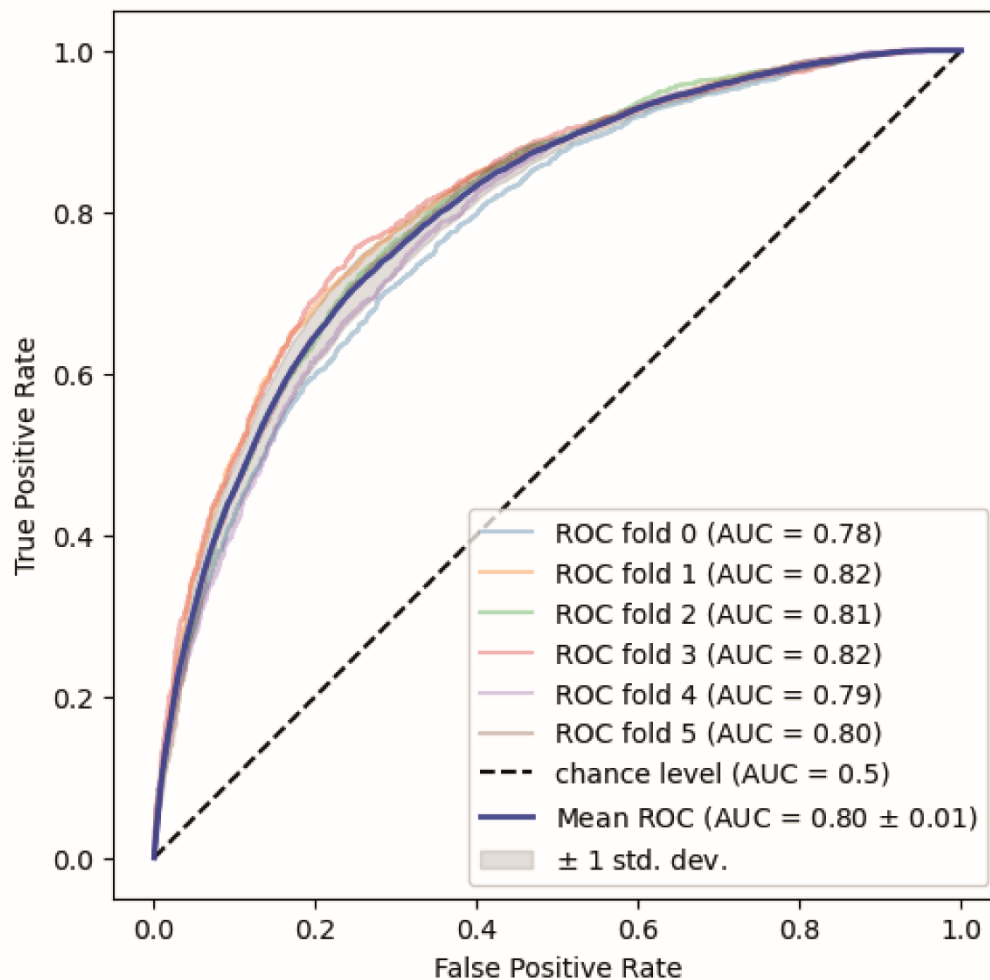

Supplemental Figure 2

The micro-average multiclass AUROC for the random forest model was 0.8. Other performance metrics for the random forest model were:

True positive rate (TPR): 0.7936205665317781

True negative rate (TNR): 0.9255359157578037

Positive predictive value (PPV): 0.8938337801608579

Negative predictive value (NPV): 0.8502332008982553

False positive rate (FPR): 0.07446408424219632

False negative rate (FNR): 0.20637943346822185

False discovery rate (FDR): 0.1061662198391421

Accuracy: 0.8673179955877718

F1-score: 0.8407514815281806

F2-score: 0.8718163275979292

Supplemental Table S3. The most relevant predictors of the clinicians' policy according to the random forest model ordered from the lowest to highest rank

| Feature                            | Component of the unit vector (normalized vectors) |
|------------------------------------|---------------------------------------------------|
| PTT min                            | 0.124653211                                       |
| Fentanyl max                       | 0.128485455                                       |
| Blood glucose max                  | 0.134108057                                       |
| Length of stay                     | 0.137129421                                       |
| Thrombocytes min                   | 0.139307112                                       |
| Urea max                           | 0.142143406                                       |
| Leucocytes mean                    | 0.142262137                                       |
| PEEP mean                          | 0.14305812                                        |
| Blood glucose std                  | 0.147403945                                       |
| Midazolam (Dormicum) max           | 0.149040607                                       |
| PEEP max                           | 0.167538026                                       |
| PEEP min                           | 0.16780183                                        |
| PTT max                            | 0.175419476                                       |
| PTT mean                           | 0.17657839                                        |
| Highest antibiotic rank            | 0.177066982                                       |
| Thrombocytes mean                  | 0.180251789                                       |
| Noradrenaline (Norepinephrine) sum | 0.187155279                                       |
| Leucocytes max                     | 0.202227827                                       |
| Thrombocytes max                   | 0.274195479                                       |
| Noradrenaline (Norepinephrine) max | 0.379869603                                       |

The normalized vector is the unit vector with a length of 1, which is defined by

$u_e = \frac{u}{||u||}$ , where  $u_e$  is the normalized vector,  $u$  the original vector, and  $||u||$  the norm of vector  $u$ . The

norm of a vector is defined by  $||u|| = \sqrt{u_1^2 + u_2^2 + \dots + u_n^2}$ , where  $u_i$  is an entry of the vector.

The normalized vector indicates how strongly a single input feature affects the decision in comparison to the other features.

Supplemental Table S4. The most relevant feature for the RL policy listed from the lowest to highest rank

| Feature                    | Component of the unit vector (normalized vectors) |
|----------------------------|---------------------------------------------------|
| Velosulin (Insulin) max    | 0.078966455                                       |
| Urinary sodium std         | 0.079285593                                       |
| Serum sodium max           | 0.079325068                                       |
| CSF protein std            | 0.079650287                                       |
| CSF protein mean           | 0.079713876                                       |
| Magnesium mean             | 0.081478474                                       |
| invasive mean BP min       | 0.081885501                                       |
| Midazolam max              | 0.084812754                                       |
| Leucocytes max             | 0.086287831                                       |
| Serum sodium mean          | 0.088578701                                       |
| invasive diastolic BP min  | 0.10005845                                        |
| Respiratory Rate min       | 0.105951594                                       |
| Blood glucose max          | 0.113368019                                       |
| Blood glucose std          | 0.114456484                                       |
| Heartrate std              | 0.114888807                                       |
| Blood glucose mean         | 0.119304028                                       |
| Leucocytes mean            | 0.120227263                                       |
| Leucocytes min             | 0.127948494                                       |
| invasive mean BP mean      | 0.131318385                                       |
| invasive diastolic BP mean | 0.136660705                                       |

PTT: partial thromboplastin time; *i*Ca: ionized Calcium; PaCO<sub>2</sub>: partial pressure of carbon dioxide in arterial blood; CSF: cerebrospinal fluid; BP: blood pressure; GOT: serum glutamic-oxaloacetic transaminase; GPT: serum glutamic-pyruvic transaminase; PCT: procalcitonin; K: serum potassium; iO<sub>2</sub>: fraction of inspired oxygen.

The normalized vector is the unit vector with a length of 1, which is defined by

$u_e = \frac{u}{||u||}$ , where  $u_e$  is the normalized vector,  $u$  the original vector, and  $|u|$  the norm of vector  $u$ . The

norm of a vector is defined by  $||u|| = \sqrt{u_1^2 + u_2^2 + \dots + u_n^2}$ , where  $u_i$  is an entry of the vector.

The normalized vector indicates how strongly a single input feature affects the decision in comparison to the other features.



Supplemental Figure S3. The 20 most relevant input features for the RL and random forest models

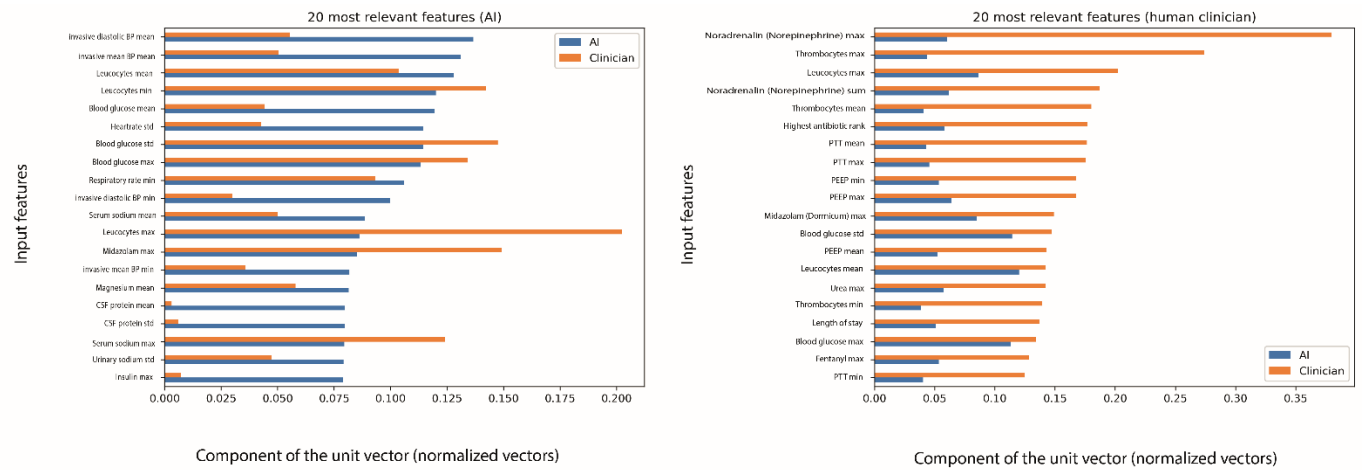

Supplemental Figure 3

The normalized vectors for 20 most relevant features for each model, sorted by rank, are displayed together with the normalized vectors of the same features in the other model.
